# Supplementary material
Source: PubMed Central journal article supplement (PMC6989358)

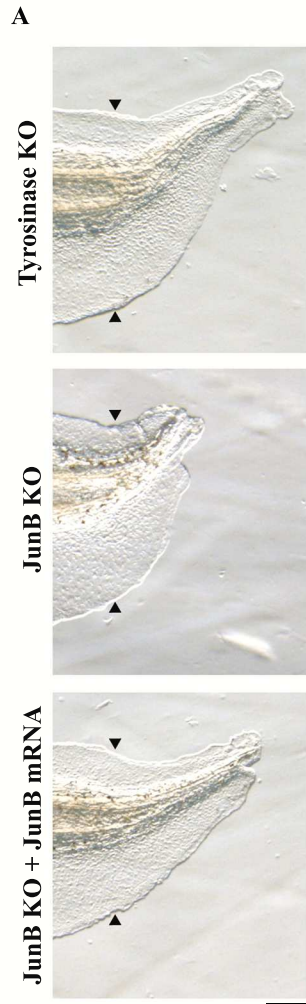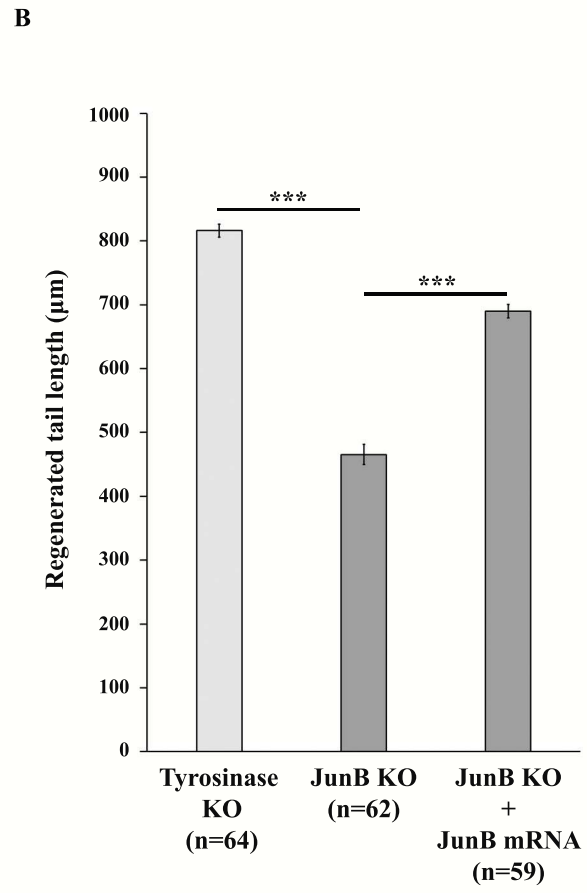

Supplement: NIHMS1064130-supplement-Supplementary_Figure_2.pdf [file NIHMS1064130-supplement-Supplementary_Figure_2.pdf]

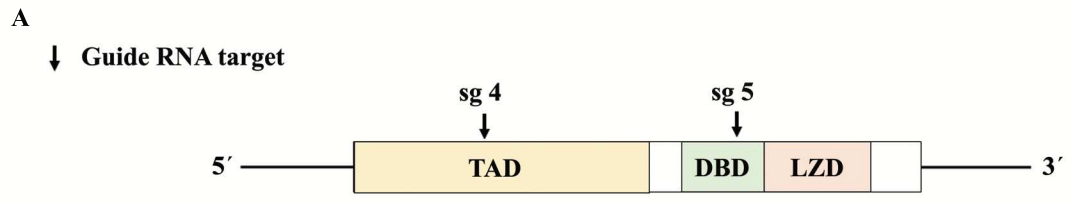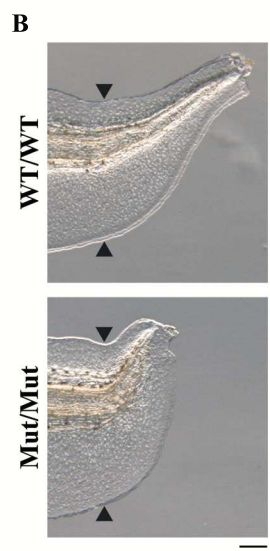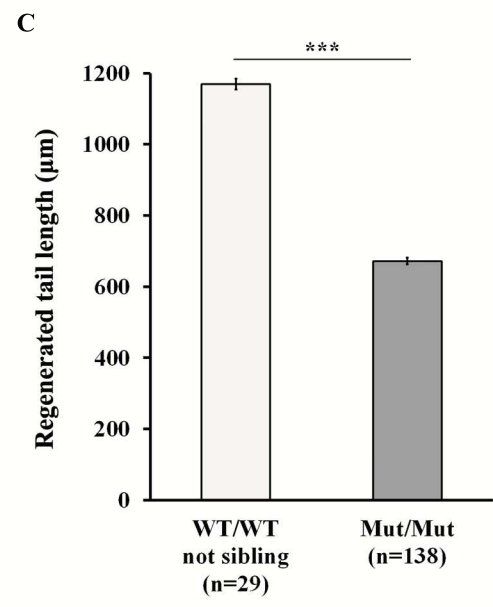

Supplement: NIHMS1064130-supplement-Supplementary_Figure_3.pdf [file NIHMS1064130-supplement-Supplementary_Figure_3.pdf]
